# Supplementary material for: Planar tetracoordinate fluorine atom: global minimum with viable possibility
Source: Royal Society of Chemistry journal article supplement (doi:10.1039/d3cp06017a), 2024-01-01
Supplement: d3cp06017a10.pdf [file d3cp06017a10.pdf]

## Supporting Information

of

### Planar Tetracoordinate Fluorine Atom: Global Minimum with Viable Possibility

Kangkan Sarmah,<sup>‡</sup> Amlan J. Kalita<sup>‡</sup> and Dr. Ankur Kanti Guha<sup>\*‡</sup>

*Advanced Computational Chemistry Centre, Cotton University, Panbazar, Guwahati, Assam,*

*INDIA-781001*

\*E-mail: [ankurkantiguha@gmail.com](mailto:ankurkantiguha@gmail.com)

<sup>‡</sup>All authors contributed equally.

Cartesian coordinates and electronic energies (a. u.) calculated at CCSD(T)/aug-cc-pVTZ/J//TPSSh-def2-TZVP level.

**<sup>2</sup>A**

**E = -131.256783**

|   |              |              |              |
|---|--------------|--------------|--------------|
| 3 | 1.478871000  | -1.278089000 | -0.000506000 |
| 3 | -1.477338000 | -1.279065000 | 0.000351000  |
| 3 | -1.252740000 | 1.192417000  | 0.000256000  |
| 3 | 1.251299000  | 1.193314000  | -0.000097000 |
| 1 | -0.001205000 | 2.468234000  | 0.000411000  |
| 1 | -2.645748000 | 0.062919000  | -0.000566000 |
| 1 | 2.645542000  | 0.065410000  | 0.000821000  |
| 9 | 0.000126000  | -0.231366000 | -0.000075000 |

**<sup>2</sup>B**

**E = -131.238836**

|   |              |              |              |
|---|--------------|--------------|--------------|
| 3 | 1.528147000  | 1.156043000  | -0.000029000 |
| 3 | -0.963219000 | 0.795072000  | 0.000191000  |
| 3 | -4.116909000 | -0.463801000 | -0.000005000 |
| 3 | 1.968827000  | -1.158136000 | 0.000144000  |
| 1 | 0.197864000  | 2.261478000  | -0.000172000 |
| 1 | -2.642472000 | 0.371993000  | 0.000142000  |
| 1 | 3.100948000  | 0.110434000  | 0.000219000  |
| 9 | 0.454791000  | -0.414604000 | -0.000121000 |

**<sup>2</sup>C**

**E = -131.237502**

|   |              |              |              |
|---|--------------|--------------|--------------|
| 3 | -0.260824000 | 1.228361000  | 0.093398000  |
| 3 | 1.581516000  | 0.000153000  | 0.936279000  |
| 3 | -0.260941000 | -1.228321000 | 0.093726000  |
| 3 | -3.418179000 | 0.000085000  | 0.139797000  |
| 1 | -1.690882000 | 0.000124000  | 0.182884000  |
| 9 | 0.764281000  | -0.000174000 | -0.740374000 |

|   |             |              |             |
|---|-------------|--------------|-------------|
| 1 | 0.943643000 | -1.669380000 | 1.345818000 |
| 1 | 0.943991000 | 1.669982000  | 1.345064000 |

**<sup>2</sup>D**

**E = -131.236143**

|   |              |              |              |
|---|--------------|--------------|--------------|
| 1 | -0.047553000 | -0.410433000 | -3.618745000 |
| 3 | -0.068658000 | -0.602774000 | -5.319498000 |
| 3 | -0.025638000 | -0.222903000 | -1.967331000 |
| 3 | 0.018344000  | 0.160570000  | 1.407208000  |
| 3 | 0.062318000  | 0.537645000  | 4.765121000  |
| 1 | 0.038201000  | 0.346391000  | 3.060544000  |
| 9 | -0.003531000 | -0.031005000 | -0.280336000 |
| 1 | 0.082037000  | 0.725476000  | 6.424722000  |

**<sup>2</sup>E**

**E = -131.235812**

|   |              |              |              |
|---|--------------|--------------|--------------|
| 3 | -0.325571000 | 1.250817000  | -0.000003000 |
| 3 | -0.325300000 | -1.250773000 | 0.000040000  |
| 3 | 2.172556000  | -1.458113000 | -0.000022000 |
| 3 | 2.172304000  | 1.458339000  | -0.000056000 |
| 9 | -1.543075000 | -0.000108000 | 0.000017000  |
| 1 | 0.830657000  | -2.620160000 | -0.000124000 |
| 1 | 0.830292000  | 2.620262000  | -0.000056000 |
| 1 | 1.144758000  | 0.000059000  | 0.000148000  |

**<sup>2</sup>F**

**E = -131.233584**

|   |              |              |              |
|---|--------------|--------------|--------------|
| 3 | -0.135606000 | -0.000086000 | 0.000165000  |
| 3 | -2.895190000 | -1.288547000 | 0.000006000  |
| 3 | -2.894699000 | 1.288875000  | -0.000052000 |
| 3 | 3.288301000  | 0.000631000  | -0.000020000 |
| 1 | -1.252834000 | -1.534534000 | 0.000156000  |
| 1 | -4.054689000 | 0.000574000  | -0.000291000 |

|   |              |              |              |
|---|--------------|--------------|--------------|
| 1 | -1.252403000 | 1.534012000  | 0.000301000  |
| 9 | 1.607945000  | -0.000297000 | -0.000051000 |

**<sup>2</sup>G**

**E = -131.203455**

|   |              |              |              |
|---|--------------|--------------|--------------|
| 3 | 0.621088000  | 1.376904000  | 0.060962000  |
| 3 | 0.487547000  | -1.301818000 | 0.434594000  |
| 3 | -2.078271000 | 1.354740000  | 0.262950000  |
| 3 | -2.176203000 | -1.330590000 | -0.111461000 |
| 9 | 1.566974000  | -0.047349000 | -0.108250000 |
| 1 | -0.753770000 | 2.386803000  | -0.296979000 |
| 1 | -3.124661000 | 0.090628000  | -0.401309000 |
| 1 | -0.786822000 | -2.349001000 | -0.268592000 |

**<sup>2</sup>H**

**E = -131.185492**

|   |              |              |              |
|---|--------------|--------------|--------------|
| 3 | 4.148685000  | 1.908534000  | -0.000017000 |
| 3 | 4.088367000  | -0.913285000 | -0.000804000 |
| 3 | -1.746519000 | -0.106578000 | 0.000822000  |
| 3 | 1.603578000  | -0.754638000 | 0.000690000  |
| 1 | 2.884606000  | -2.088549000 | -0.000436000 |
| 9 | -3.360014000 | 0.170820000  | -0.000393000 |
| 1 | 3.128280000  | 0.539756000  | 0.000168000  |
| 1 | -0.055088000 | -0.390691000 | 0.001737000  |

Cartesian coordinate of the lowest energy isomer (**<sup>2</sup>A**) calculated at CCSD(T)/aug-cc-pVQZ level.

**<sup>2</sup>A**

|   |              |              |              |
|---|--------------|--------------|--------------|
| 3 | 1.510127000  | -1.270539000 | 0.000080000  |
| 3 | -1.508966000 | -1.271948000 | -0.000281000 |
| 3 | -1.264216000 | 1.174249000  | 0.000093000  |
| 3 | 1.263013000  | 1.175344000  | 0.000284000  |
| 1 | -0.001196000 | 2.515200000  | 0.000303000  |
| 1 | -2.743596000 | 0.075973000  | -0.000185000 |

|   |             |              |              |
|---|-------------|--------------|--------------|
| 1 | 2.743507000 | 0.078544000  | 0.000318000  |
| 9 | 0.000135000 | -0.283049000 | -0.000016000 |
